# Supplementary material for: Identification of non-ischaemic fibrosis in male veteran endurance athletes, mechanisms and association with premature ventricular beats
Source: Springer Nature journal article supplement (doi:10.1038/s41598-023-40252-z), 2023-09-05
Supplement: 41598_2023_40252_MOESM1_ESM.pdf [file 41598_2023_40252_MOESM1_ESM.pdf]

**Table 1: Cycling competition history according to presence of fibrosis.**

|                                          | <b>Cyclist LGE-</b> | <b>Cyclist LGE+</b> | <b><i>P value</i></b> |
|------------------------------------------|---------------------|---------------------|-----------------------|
| <b>N</b>                                 | 20                  | 21                  |                       |
| <b>Active Years</b>                      | 24.4 ± 11.3         | 28.4 ± 14.5         | 0.34                  |
| <b>Training per week (hrs)</b>           | 11.5 ± 1.8          | 11.5 ± 2.1          | 0.91                  |
| <b>Total no. Competitions</b>            | 622.5 ± 587.7       | 702.1 ± 567.4       | 0.67                  |
| <b>Competitions per year</b>             | 22.8 ± 13.4         | 31.3 ± 27.7         | 0.22                  |
| <b>Total distance (miles)</b>            | 22 853.7 ± 33 546.7 | 33 595.0 ± 38 063.1 | 0.35                  |
| <b>Average distance per race (miles)</b> | 40.4 ± 59.9         | 49.0 ± 43.3         | 0.61                  |
| <b>Total time (hrs)</b>                  | 1194.1 ± 1456.3     | 1633.2 ± 1610.2     | 0.37                  |

Values are mean ± standard deviation.

LGE- = Fibrosis absent; LGE+ = Fibrosis present.

**Table 2: Triathlon competition history according to presence of fibrosis.**

|                                     | <b>Triathlete LGE-</b> | <b>Triathlete LGE+</b> | <b><i>P value</i></b> |
|-------------------------------------|------------------------|------------------------|-----------------------|
| <b>N</b>                            | 6                      | 3                      |                       |
| <b>Active Years</b>                 | 25.5 ± 9.4             | 23.0 ± 13.0            | 0.75                  |
| <b>Training per week (hrs)</b>      | 11.3 ± 1.7             | 10.7 ± 1.2             | 0.61                  |
| <b>Total no. Competitions</b>       | 215.3 ± 195.7          | 81.7 ± 89.8            | 0.31                  |
| <b>Competitions per year</b>        | 7.5 ± 5.3              | 3.0 ± 2.6              | 0.22                  |
| <b>Total swimming distance (km)</b> | 247.4 ± 175.6          | 102.3 ± 99.6           | 0.23                  |
| <b>Total cycling distance (km)</b>  | 7343.3 ± 4596.2        | 3073.3 ± 2731.0        | 0.19                  |
| <b>Total running distance (km)</b>  | 1807.3 ± 1149.6        | 759.3 ± 672.0          | 0.20                  |
| <b>Total distance (km)</b>          | 9398.0 ± 5918.1        | 3935.0 ± 3500.6        | 0.19                  |
| <b>Total time (hrs)</b>             | 465.7 ± 270.6          | 185.7 ± 153.7          | 0.15                  |
| <b>No of sprint distances</b>       | 103.0 ± 134.5          | 37.3 ± 46.5            | 0.45                  |
| <b>No of Olympic distances</b>      | 316.0 ± 588.9          | 35.7 ± 47.5            | 0.45                  |
| <b>No of middle distances</b>       | 11.0 ± 8.7             | 2.7 ± 3.1              | 0.16                  |
| <b>No of iron man distances</b>     | 4.0 ± 7.5              | 3.3 ± 4.9              | 0.90                  |

Values are mean ± standard deviation.

LGE- = Fibrosis absent; LGE+ = Fibrosis present.
